# Supplementary figures and images for: A genome-wide survey of structural variation between human and chimpanzee
Source: HighWire-hosted journal article supplement (doi:10.1101/gr.4338005), 2005-09-16

Supplementary figure 1

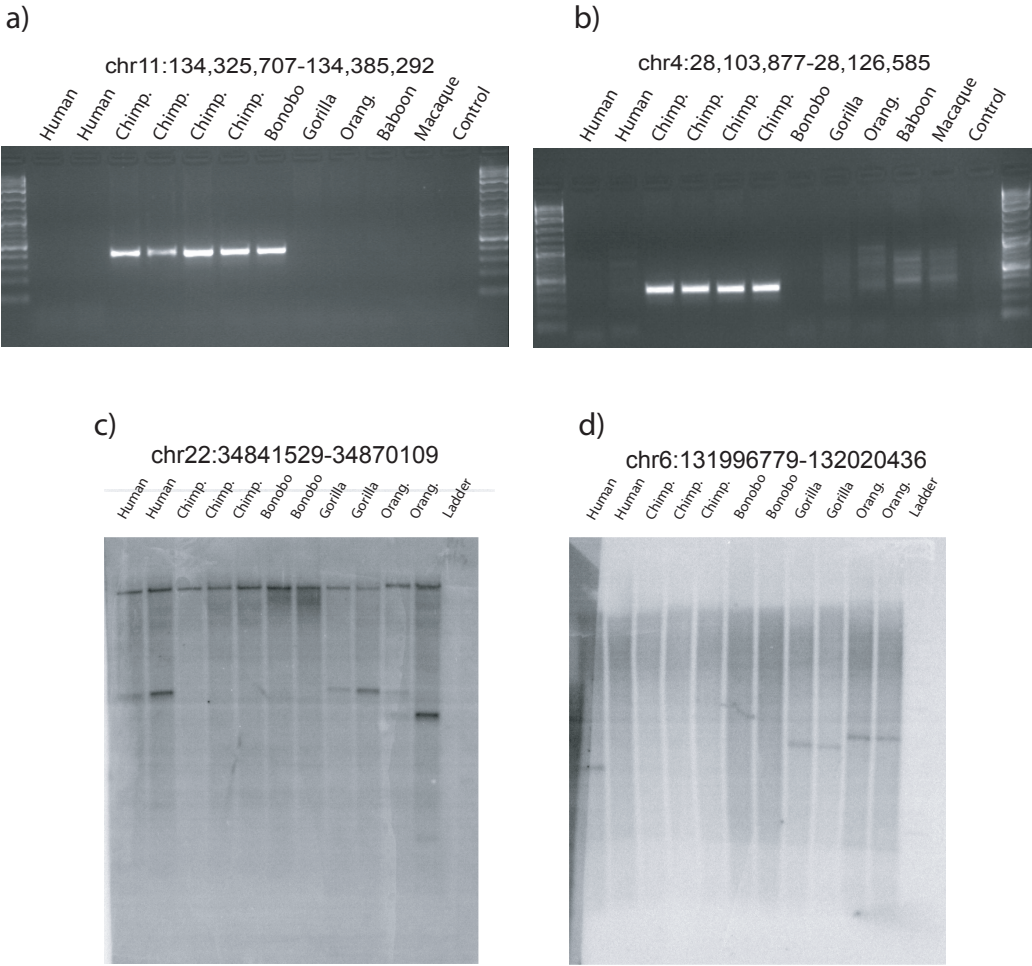

Supplement: Newman_FigureS1.pdf [file Newman_FigureS1.pdf]
